# Supplementary material
Source: PubMed Central journal article supplement (PMC3887143)
Supplement: NIHMS538710-supplement-1.pdf [file NIHMS538710-supplement-1.pdf]

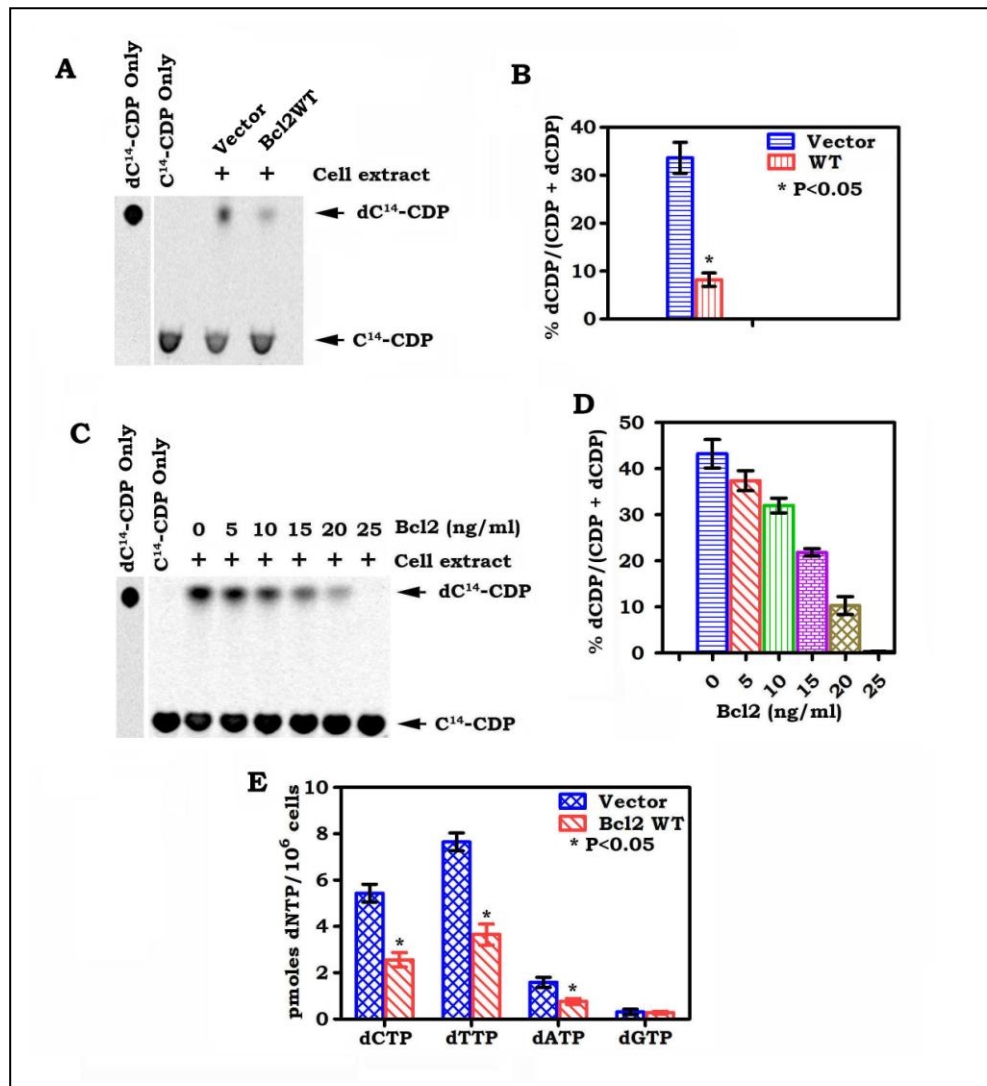

**Figure S1.** Bcl2 downregulates intracellular dNTPs via inhibition of RNR activity. *A-B*, extracts from H1299 cells expressing WT Bcl2 or vector-only control were incubated with <sup>14</sup>C-CDP. The generation of <sup>14</sup>C-dCDP was analyzed by a phosphorImager on TLC. The relative abundance of <sup>14</sup>C-dCDP and <sup>14</sup>C-CDP was quantified with imageQuant software. RNR activity was calculated by a formula as <sup>14</sup>C-dCDP/(<sup>14</sup>C-CDP+<sup>14</sup>C-dCDP). Error bars represent  $\pm$ SD of three repeated determinations. *C-D*, the extract from vector-only H1299 cells was incubated with <sup>14</sup>C-CDP in the reaction buffer in the absence or presence of increasing concentrations of purified recombinant Bcl2 protein. RNR activity was analyzed as above. *E*, intracellular levels of dNTPs in H1299 cells expressing WT or vector-only control were measured. Error bars represent  $\pm$ SD of three repeated determinations.
