# Supplementary material
Source: PubMed Central journal article supplement (PMC3887143)
Supplement: NIHMS538710-supplement-3.pdf [file NIHMS538710-supplement-3.pdf]

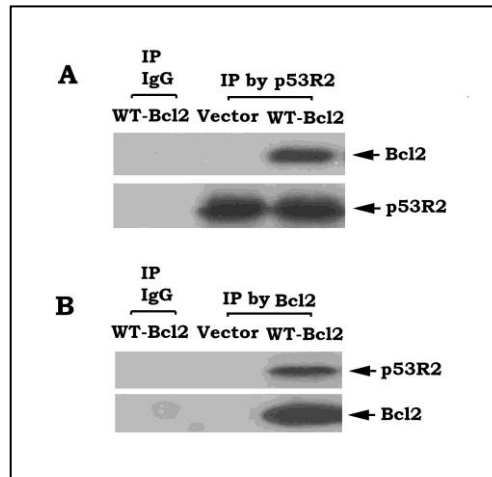

**Figure S3.** Bcl2 interacts with p53R2. *A*, H1299 cells expressing WT-Bcl2 or vector-only control were lysed in EBC buffer. Co-IP experiments were carried out using p53R2 antibody. Normal rabbit IgG was used as the IP control. The p53R2-associated Bcl2 and p53R2 were analyzed by Western Blot. *B*, co-IP experiments were performed using Bcl2 antibody in H1299 cells expressing WT-Bcl2 or Vector-only control. The Bcl2-associated p53R2 and Bcl2 were analyzed by Western blot.
