# Supplementary material
Source: PubMed Central journal article supplement (PMC3887143)
Supplement: NIHMS538710-supplement-4.pdf [file NIHMS538710-supplement-4.pdf]

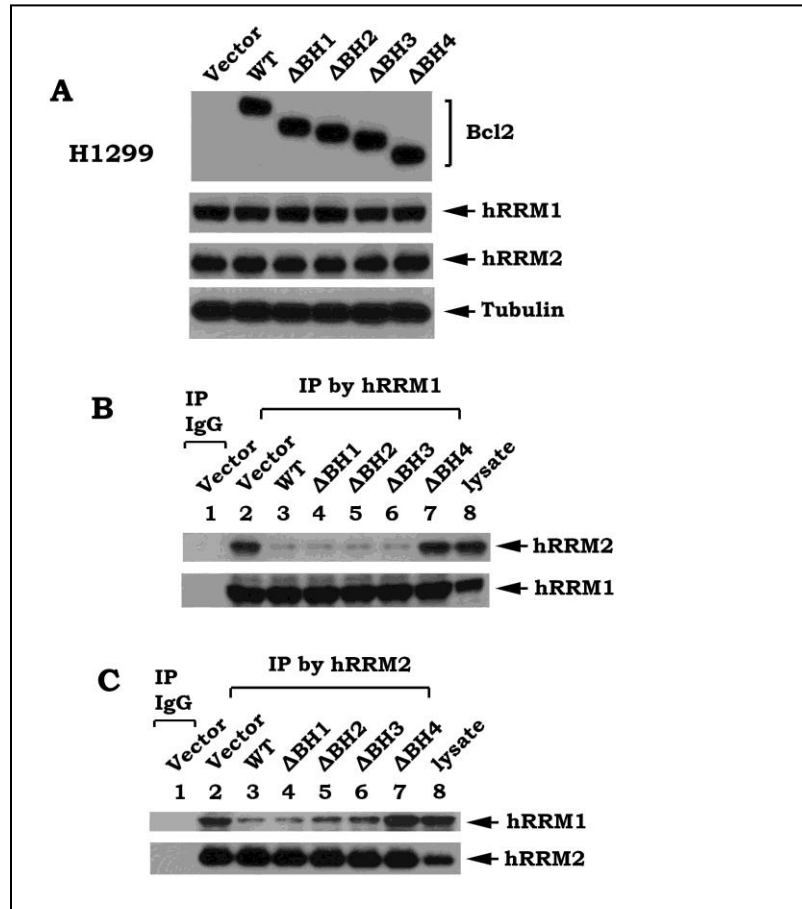

**Figure S4.** Expression of exogenous Bcl2 in H1299 cells reduces the formation of hRRM1/hRRM2 complexes, which requires the BH4 domain. *A*, WT or each of the BH deletion Bcl2 mutants was stably transfected into H1299 cells. Expression levels of Bcl2, hRRM1 and hRRM2 were analyzed by Western blot. *B-C*, H1299 cells expressing WT or each of the BH deletion Bcl2 mutants were disrupted in 1% CHAPS lysis buffer. Co-IP experiments were performed with hRRM1 or hRRM2 antibody, respectively. The hRRM1-associated hRRM2 and hRRM2-associated hRRM1 were analyzed by Western blot.
