# Supplementary material
Source: PubMed Central journal article supplement (PMC3887143)
Supplement: NIHMS538710-supplement-5.pdf [file NIHMS538710-supplement-5.pdf]

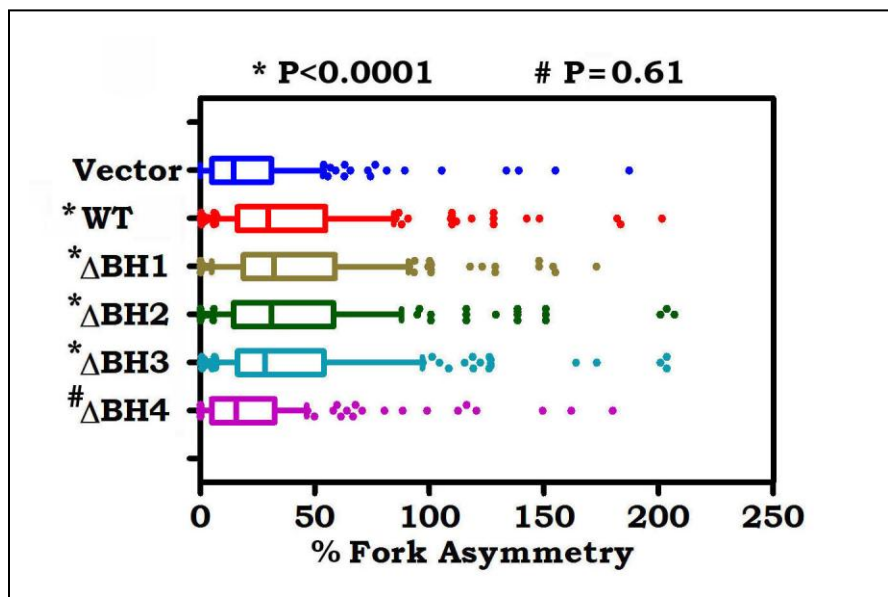

**Figure S5.** The BH4 domain is essential for Bcl2 to cause the asymmetrical DNA replication. Distribution of the degree of asymmetry of bidirectional replication forks was compared in H1299 cells expressing WT or each of BH deletion Bcl2 mutants.
