# Supplementary material
Source: PubMed Central journal article supplement (PMC3887143)
Supplement: NIHMS538710-supplement-6.pdf [file NIHMS538710-supplement-6.pdf]

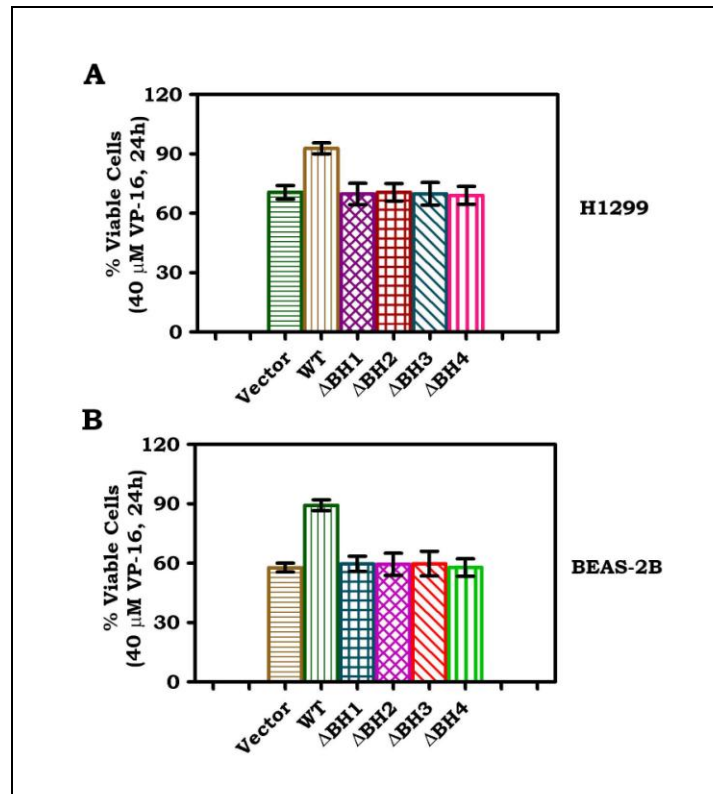

**Figure S6.** Removal of any BH domain from Bcl2 reduces its anti-apoptotic function. H1299 (A) and BEAS-2B (B) cells expressing WT or each of the BH deletion Bcl2 mutants were treated with VP-16 (40  $\mu$ M) for 24h. Cell viability was determined by analyzing annexin-V binding on flow cytometry.
